# Supplementary material
Source: publisher figshare collection journal article supplement (https://gsapubs.figshare.com/ndownloader/files/22410048)
Supplement: Supplementary file 1 [file 22410048]

**Supplemental File 1: Citations and references for Figure 2 map that shows igneous age units for the southern Sierra Nevada batholith as well as selected drainage divides** (Z=zircon U/Pb geochronology, M=map relations; note that majority of zircon age sample locations are plotted on regional map of Nadin et al., 2016, Fig. 2a)**.**

Domain 1-Kings, Kaweah and Tule river drainages

Bateman (1965)

Busby (1982) Z and M

Chen and Moore (1982) Z

Clemens-Knott and Saleeby (1999) Z and M

Klemetti et al., (2014) Z

Lackey et al., (2012) Z

Moore (1963) M

Moore (1981) M

Moore and Nokleberg (1991) M

Moore and Sisson (1987a) M

Moore and Sisson (1987b) M

Saleeby (2004)

Saleeby and Sharp (1980) Z and M

Saleeby et al. (1990) Z and M

Saleeby and Dunne (2015) Z and M

Stern et al., (1981) Z and M

Tobisch et al., (1986) Z and M

Tobisch et al., (1995) Z and M

Wolf and Saleeby (1995) Z and M

Domain 2-White River-Poso Creek range front

Ross (1989, 1995) M

Saleeby and Sharp (1980) Z and M

Saleeby et al., (2008) Z and M

Domain 3-Kern River drainage

Bergquist and Nitkiewicz (1982) M

Chen and Moore (1982) Z

Diggles (1987) M

Diggles and Dellinger (1988) M

Diggles et al. (1987) M

Moore (1981) M

Moore and Sisson (1985) M

Ross (1986, 1995) M

Saleeby et al., (2008) Z and M

Saleeby and Dunne (2015) Z and M

Domain 4-southernmost Sierra-eastern Tehachapi Range

Ross (1989) M

Chapman et al. (2012) Z and M

Saleeby et al. (2007, 2008) Z and M

Wood (1997) Z and M

Domain 5-western Tehachapi-San Emigdio Ranges

James et al. (1993) Z

Pickett and Saleeby (1994) Z and M

Chapman et al. (2012) Z and M

Saleeby et al. (1987, 2007) Z and M

Owens and Indian Wells valleys region

Chen and Moore (1982) Z

Carr et al. (1997) M

Dunne et al. (1978) Z and M

Dunne and Walker (1993, 2004) Z and M

Martin and Walker (1995) Z

Miller et al. (1995) Z and M

Bartley et al. (2007) Z and M

Saleeby and Dunne (2015) Z and M

**References Cited**

Bateman, P.C., 1965, Geologic map of the Blackcap Mountain Quadrangle, Fresno County, California, United States Geological Survey Map GQ-428, 1:62,500.

Bartley, J.M., Glazner, A.F., Coleman, D. S., Kylander-Clark, A., Mapes, R., and Friedrich, A.M., 2007, Large Laramide dextral offset across Owens Valley, California, and its possible relation to teconic unroofing of the southern Siera Nevada, in Till, A.B., Roeske, S.M., Sample, J.C., and Foster, D.A., eds. Exhumation Associated With Continental Strike-Slip Fault Systems: Geological Society ofAmerica Special Paper 434, p. 129-148.

Bergquist, J.R., and Nitkiewicz, A.M., 1982, Geologic map of the Domelands Wilderness and contiguous roadless areas, Kern and Tulare Counties, California: U.S. Geological Survey Miscellaneous Field Studies Map MF-1395-A, scale 1:48,000, 1 sheet.

Busby, C.J., 1982, Paleogeographic reconstruction of a submarine volcanic center: geochronology, volcanology and sedimentology of the Mineral King Roof pendant, Sierra Nevada California, Ph.D. Dissertation, Princeton University, 290 pp., 1 plt.

Carr, M.D., Christiansen, R. L., Poole, F. G., and Goodge, J. W., 1997, Bedrock Geologic Map of the El Paso Mountains in the Garlock and El Paso Peaks 7-1/2ʹ Quadrangles, Kern County, California: U.S. Geological Survey MiscellaneousInvestigation Series Map I-2389, scale 1:24,000, 1 sheet, 9 p. text.

Chapman, A.D., Saleeby, J., Wood, D.J., and Piasecki, A., Kidder, S., Ducea, M.N., and Farley, K.A., 2012, Regional displacement analysis and palinspastic restoration of dispersed crustal fragments in the southern Sierra Nevada, California, Geosphere, doi:10.1029/2009TC002597.

Clemens-Knott, D., and Saleeby, J.B., 1999, Impinging ring dike complexes in the Sierra Nevada batholith, California: Roots of the Early Cretaceous volcanic arc: Geological Society of America Bulletin, v. 111, no. 4, p. 484-496.

Diggles, M.F., 1987, Mineral resource potential map of the South Sierra Wilderness and South Sierra Roadless Area, Inyo and Tulare Counties, California: U.S. Geological Survey Miscellaneous Field Studies Map MF-1913-A, scale 1:48,000, 1 sheet.

Diggles, M.F., and Dellinger, D.A., 1988, Petrologic and petrochemical variation in the Sacatar Quartz Diorite, southern Sierra Nevada, California: Geological Society of America Abstracts with Programs, v. 20, no. 3, p. 155.

Diggles, M.F., Dellinger, D.A., and Conrad, J.E., 1987, Geologic map of the Owens Peak and Little Lake Canyon Wilderness Study Areas, Inyo and Kern Counties, California: U.S. Geological Survey Miscellaneous Field Studies Map MF-1927-A, scale 1:48,000, 1 sheet.

du Bray, E.A., and Dellinger, D.A., 1981, Geologic Map of the Golden Trout Wilderness, Southern Sierra Nevada, California: U.S. Geological Survey Miscellaneous Field Studies Map MF-1231-A, scale 1:48,000.

Dunne, G.C., Gulliver, R., and Sylvester, A., 1978, Mesozoic evolution of the Inyo, Argus, and Slate Ranges, eastern California, in D. Howell, ed., Mesozoic Paleogeography of the Western United States: Pacific Section, Society of Economic Paleontologists and Mineralogists, p. 189-206.

Dunne, G.C. and Walker, J.D., 1993, Age of Jurassic volcanism and tectonism, southern Owens Valley region, east-central California, Geological Society of America Bulletin, v. 105, p. 1223-1230.

Dunne, G.C. and Walker, J.D., 2004, Structure and evolution of the East Sierran thrust system, east-central California: Tectonics, v. 23,

TC4012, doi:10.1029/2002TC001478.

James, E.W., Kimbrough, D.L., and Mattinson, J.M., 1993, Evaluation of displacements of pre-Tertiary rocks on the northern San Andreas fault using U-Pb zircon dating, initial Sr, and common Pb isotopic ratios: Geological Society of America Memoir 178, p. 257–271.

Klemetti, E.W., Lackey, J.S., and Starnes, J., 2014, Magmatic lulls in the Sierra Nevada captured in zircon from rhyolite of the Mineral King pendant, California, Geosphere, v. 10; no. 1; p. 66–79; doi:10.1130/GES00920.1.

Lackey, J.S., Cecil, M.R., Windham, C.J., Frazer, R.E., Bindeman, I.N., and Gehrels, G.E., 2012, The Fine Gold Intrusive Suite: The roles of basement terranes and magma source development in the Early Cretaceous Sierra Nevada batholith, Geosphere, v. 8, n. 2, p. 292–313; doi: 10.1130/GES00745.1.

Martin, M.W., and Walker, J.D., 1995, Stratigraphy and paleogeographic significance of metamorphic rocks in the Shadow Mounatins, western Mojave Desert, California: Geological Society of America Bulletin, v. 107, n. 3, p. 354-366.

Miller, J. S., Glazner, A. F., Walker, J. D., and Martin, M. W., 1995, Geochronologic and isotopic evidence for Triassic-Jurassic emplacement of the eugeoclinal allochthon in the Mojave Desert region, California: Geological Society of America Bulletin, v. 107, p. 1441-1457.

Moore, J.G., 1963, Geology of the Mount Pinchot Quadrangle southern Sierra Nevada California, United States Geological Survey Bulletin 1130, 152 pp., 2 plts.

Moore, J.G., 1981, Geologic map of the Mount Whitney Quadrangle, Inyo and Tulare Counties, California, United States Geological Survey Map GQ-1545, 1:62,500.

Moore, J.G., and Nokleberg, 1991, Geologic map of the Tehipite Dome Quadrangle, Tulare County, California, United States Geological Survey Map GQ-1676, 1:62,500.

Moore, J.G., and Sisson, T.W., 1985, Geologic map of the Kern Peak Quadrangle, Tulare County, California, United States Geological Survey Map GQ-1584, 1:62,500.

Moore, J.G., and Sisson, T.W., 1987a, Geologic map of the Triple Divide Peak Quadrangle, Tulare County, California, United States Geological Survey Map GQ-1636, 1:62,500.

Moore, J.G., and Sisson, T.W., 1987a, Preliminary geologic map of Sequoia and Kings Canyon National Parks, California, United States Geological Survey Map OF 87-651, 1:125,000.

Nadin, E.S., Saleeby, J., and Wong, M., 2016, Thermal evolution of the Sierra Nevada batholith, California, and implications for strain localization, Geosphere, v. 12, n. 2, doi:10.1130/GES01224.1.

Pickett, D.A., and Saleeby, J.B., 1994, Nd, Sr and Pb isotopic characteristics of Cretaceous intrusive rocks from deep levels of the Sierra Nevada batholith, Tehachapi Mountains, California: Contrib. to Min. and Pet., v. 118, p. 198-215.

Ross, D.C., 1986, Basement–Rock Correlations across the White Wolf–

Breckenridge–Southern Kern Canyon Fault Zone, Southern Sierra Nevada, California: U.S. Geological Survey Bulletin B1651, 25 p.

Ross, D.C., 1989, The metamorphic and plutonic rocks of the southernmost Sierra Nevada, California and their tectonic framework: U.S. Geol. Surv. Prof. Pap. 1381, 159 pp., 2 plts.

Ross, D.C., 1995, Reconnaissance geologic map of the southern Sierra Nevada, Kern, Tulare and Inyo Counties, California, United States Geological Survey Map I-2295, 1:125,000.

Saleeby, J., 2004, Personal observations and reconnaissance zircon U/Pb dating, medial to upper Tule River drainage.

Saleeby, J.B. and Sharp, W.D., 1980, Chronology of the structural and petrologic development of the southwest Sierra Nevada Foothills, California: Geological Society of America Bulletin Part I, v. 91, p. 317‑320; Part II, v. 91, p. 1416‑1535.

Saleeby, J.B., Sams, D.B. and Kistler, R.W., 1987, U/Pb zircon, strontium, and oxygen isotopic and geochronological study of the southernmost Sierra Nevada batholith, California: Journal of Geophysical Research, v. 92, p. 10,443‑10,446.

Saleeby, J.B., Kistler, R.W., Longiaru, S., Moore, J.G. and Nokleberg, W.J., 1990, Middle Cretaceous silicic metavolcanic rocks in the Kings Canyon area, central Sierra Nevada, California: in J.L. Anderson, ed., The nature and origin of Cordilleran magmatism: Boulder, Colorado, Geological Society of America Memoir 174, 251-270.

Saleeby, J., and Dunne, G., 2015. Temporal and tectonic relations of early Mesozoic arc magmatism, southern Sierra Nevada, California. In Anderson,T. H., Didenko, A.N., John- son, C.L., Khanchuk, A.I., and MacDonald Jr., J.H., (Eds.), Late Jurassic Margin of the Laurasia—A Record of Faulting Accommodating Plate Rotation. Geological Society of America Special Paper 513, doi:10.1130/2015.2513(05).

Saleeby, J., Farley, K., Kistler, R.W., and Fleck, R., 2007, Thermal evolution and exhumation of deep level batholithic exposures, southernmost Sierra Nevada, California, in Cloos, M., Carlson, W.D., Gilbert, M.C., Liou, J.G., and Sorensen, S.S., Geol. Soc. Amer. Sp. Pap. 419, Convergent Margin Terranes and Associated Regions, a Tribute to W.G. Ernst, Chap. 2, p. 39-66.

Saleeby, J., Ducea, M.N., Busby, C.J., Nadin, E.S., and Wetmore, P.H., 2008, Chronology of pluton emplacement and regional deformation in the southern Sierra Nevada, California: in Wright, J.E. and Shervais, J.W. eds., Ophiolites, Arcs and Batholiths: A Tribute to Cliff Hopson, Geol. Soc. Amer. Sp. Pap. 438, p.397-428.

Stern, T. W. Bateman, P.C., Morgan, B.S., Newell, M.F., Peck, D.L., 1981. Isotopic U-Pb ages of zircon from the granitoids of the central Sierra Nevada, California. U.S. Geological Survey Professional Paper 1185, 17 pp.

Tobisch, O.T., Saleeby, J.B. and Fiske, R.S., 1986, Structural history of continental volcanic arc rocks along part of the eastern Sierra Nevada, California: A case for extensional tectonics: Tectonics, v. 5, p. 65‑94.

Tobisch, O.T., Saleeby, J.B., Renne, P.R., McNulty, B., and Tong, W, 1995, Variations in deformation fields during development of a large volume magmatic arc, central Sierra Nevada, California: Geological Society of America Bulletin, v. 107, no. 2, p. 148-166.

Wolf, M.B., and Saleeby, J.B., 1995, Late Jurassic dike swarms in the southwestern Sierra Nevada Foothills terrane, California: Implications for the Nevadan orogeny and North American plate motion, *in* Miller, D.M., and Busby, C., eds., Jurassic Magmatism and Tectonics of the North American Cordillera: Boulder, Colorado, Geological Society of America Special Paper 299, p. 203-228.

Wood, D.J., 1997, Geology of the eastern Tehachapi Mouintains and Late Cretaceous-early Cenozoic tectonics of the southern Sierra Nevada region, unpub. Ph.D. Dissertation, California Institute of Technology, 287 pp.
